# Supplementary material for: InN nanorod/Ni(OH)2 heterojunction photoelectrode for efficient photoelectrochemical water splitting
Source: Royal Society of Chemistry journal article supplement (doi:10.1039/d3ce00993a), 2023-01-01
Supplement: d3ce00993a1.pdf [file d3ce00993a1.pdf]

## Supporting Information

### **InN Nanorods/Ni(OH)<sub>2</sub> Heterojunction Photoelectrode for Efficient PEC Water splitting**

Mengzhou Wu,<sup>a,b</sup> Haoyang Wu,<sup>a,b</sup> Shaohua Xie,<sup>a,b</sup> Wenliang Wang<sup>a,b,\*</sup> and Guoqiang Li<sup>a,b,c,\*</sup>

<sup>a</sup> State Key Laboratory of Luminescent Materials and Devices, South China University of Technology, Guangzhou 510640, China.

<sup>b</sup> Department of Electronic Materials, School of Materials Science and Engineering, South China University of Technology, Guangzhou 510640, China.

<sup>c</sup> Guangdong Choicore Optoelectronics Co., Ltd., Heyuan 517003, China

\* Corresponding author, E-mail: wenliangwang@scut.edu.cn and msgli@scut.edu.cn

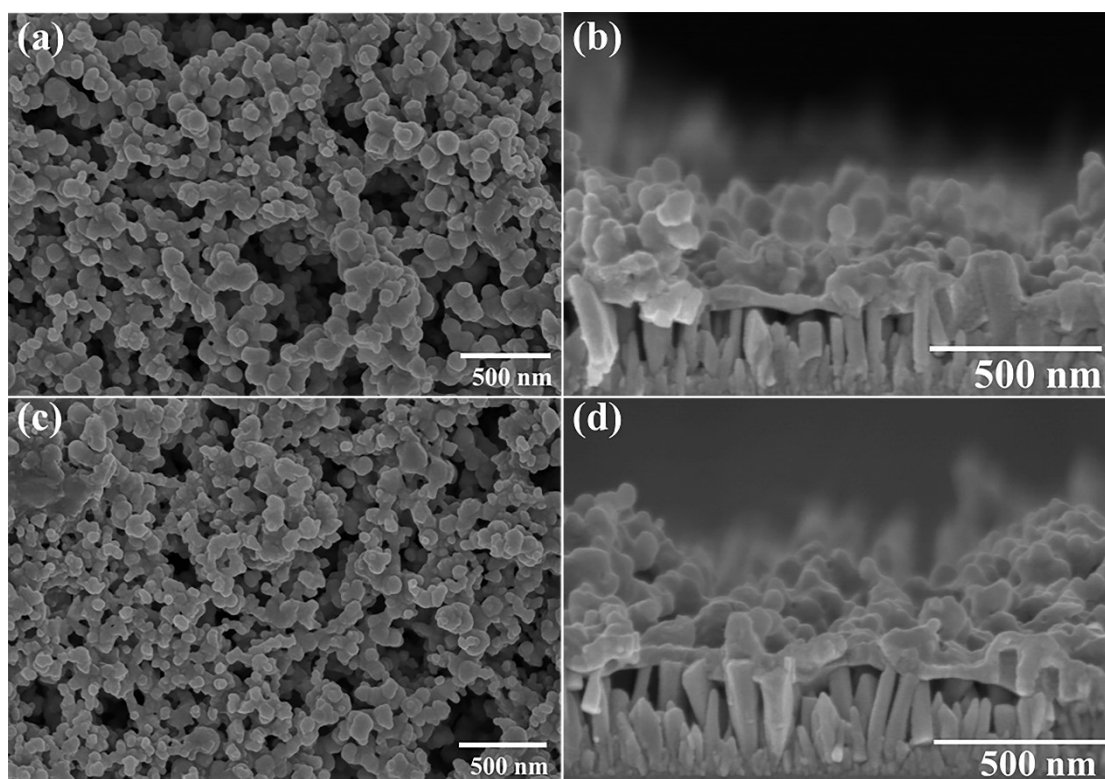

**Fig. S1** (a) SEM top-view and (b) cross-sectional images of the InN/Ni(OH)<sub>2</sub>-60. (c) SEM top-view and (d) cross-sectional images of the InN/Ni(OH)<sub>2</sub>-180.

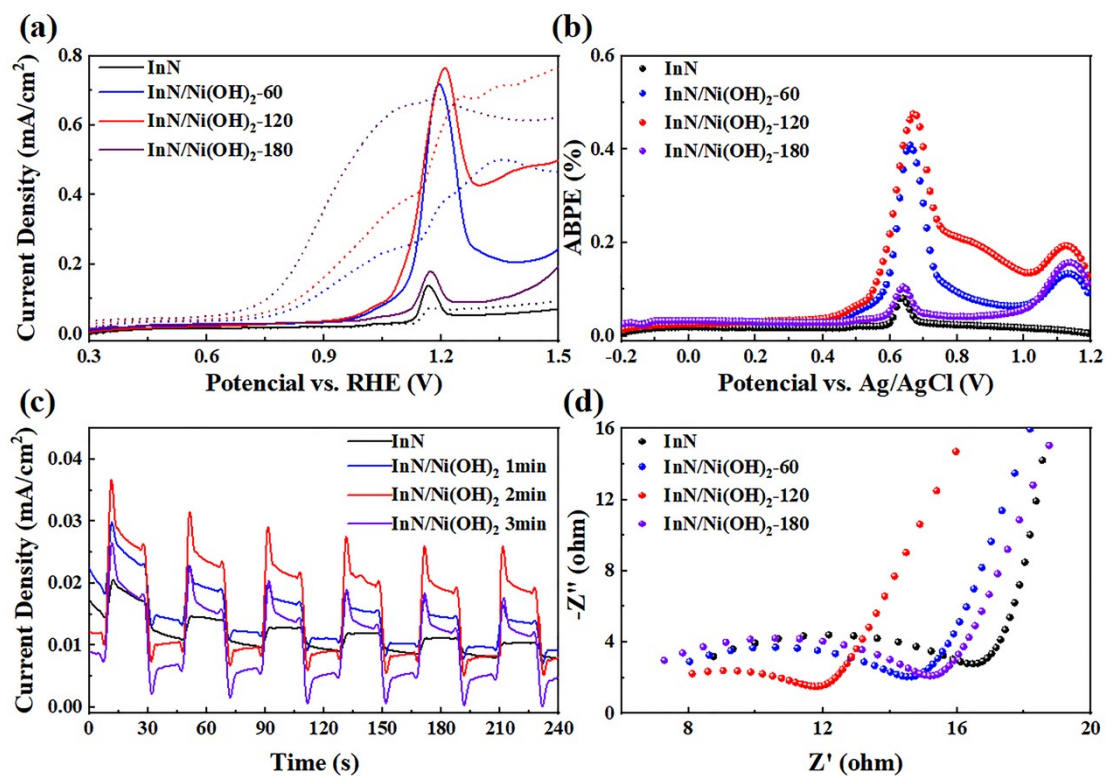

**Fig. S2** In the 0.1 M Na<sub>2</sub>PO<sub>4</sub> solution with pH = 9, PEC properties of InN and InN/Ni(OH)<sub>2</sub> photoelectrodes. (a) LSV curves, (b) ABPE curves of all photoelectrodes, (c) I-T curves, (d) EIS spectra of all photoelectrodes at 0.72 V vs. RHE.

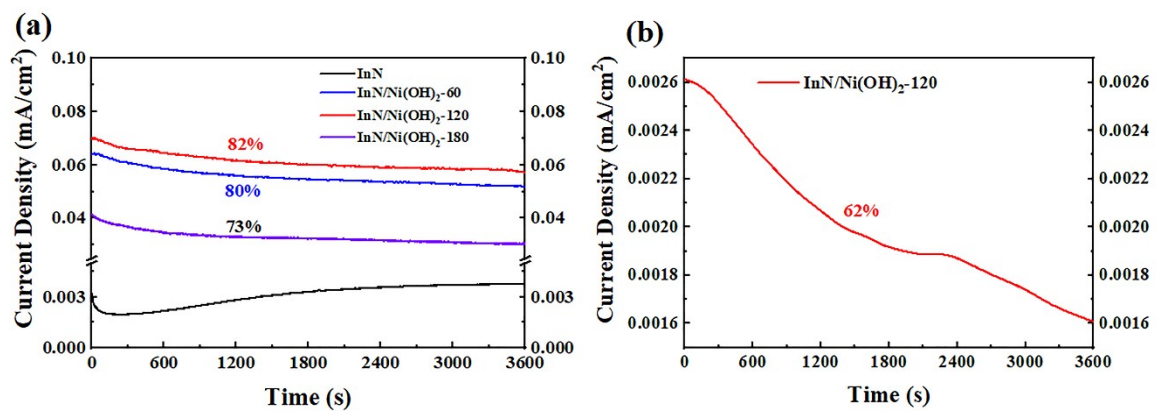

**Fig. S3** (a) The stability of InN NRs and InN/Ni(OH)<sub>2</sub> photoelectrode (pH = 13), (b) the stability of InN/Ni(OH)<sub>2</sub>-120 photoelectrode (pH = 9).

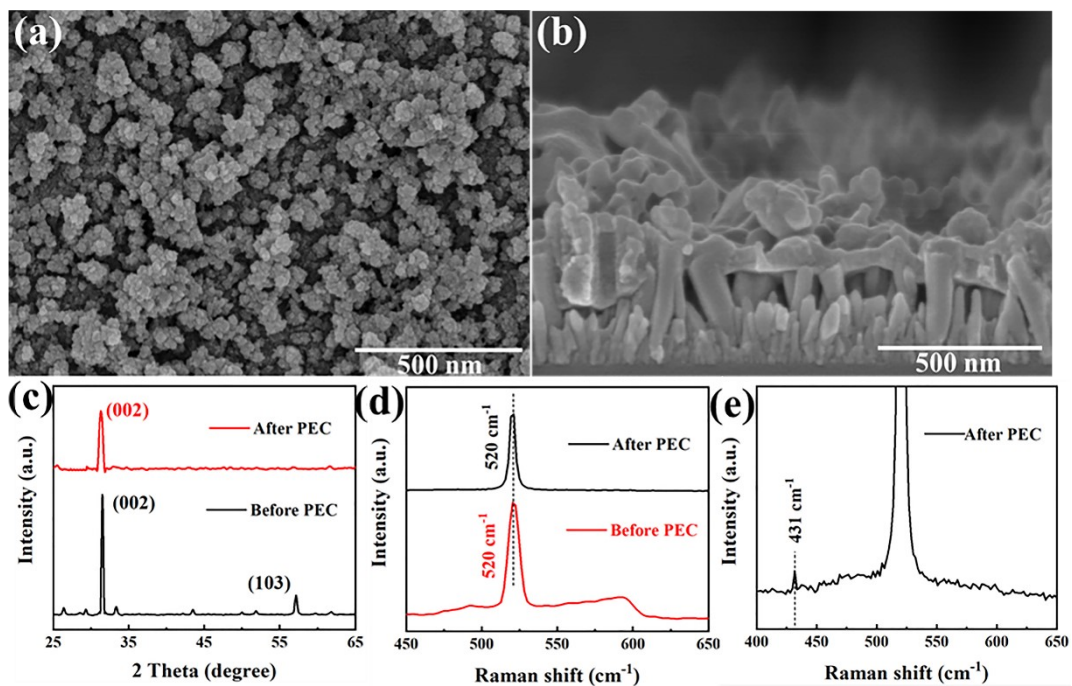

**Fig. S4** (a) SEM top-view and (b) cross-sectional images of the InN/Ni(OH)<sub>2</sub>-120 after PEC test, (c)-(d)XRD patterns and (e) Raman spectra of the InN/Ni(OH)<sub>2</sub>-120 after PEC test.

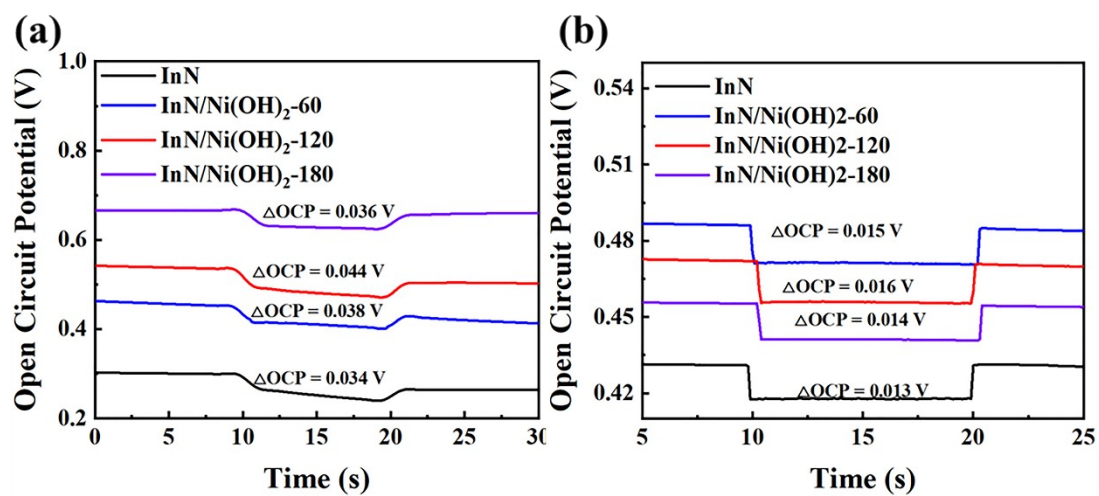

**Fig. S5** (a) OCP of the all photoelectrode samples (pH = 13), (b) OCP of the all photoelectrode samples (pH = 9).

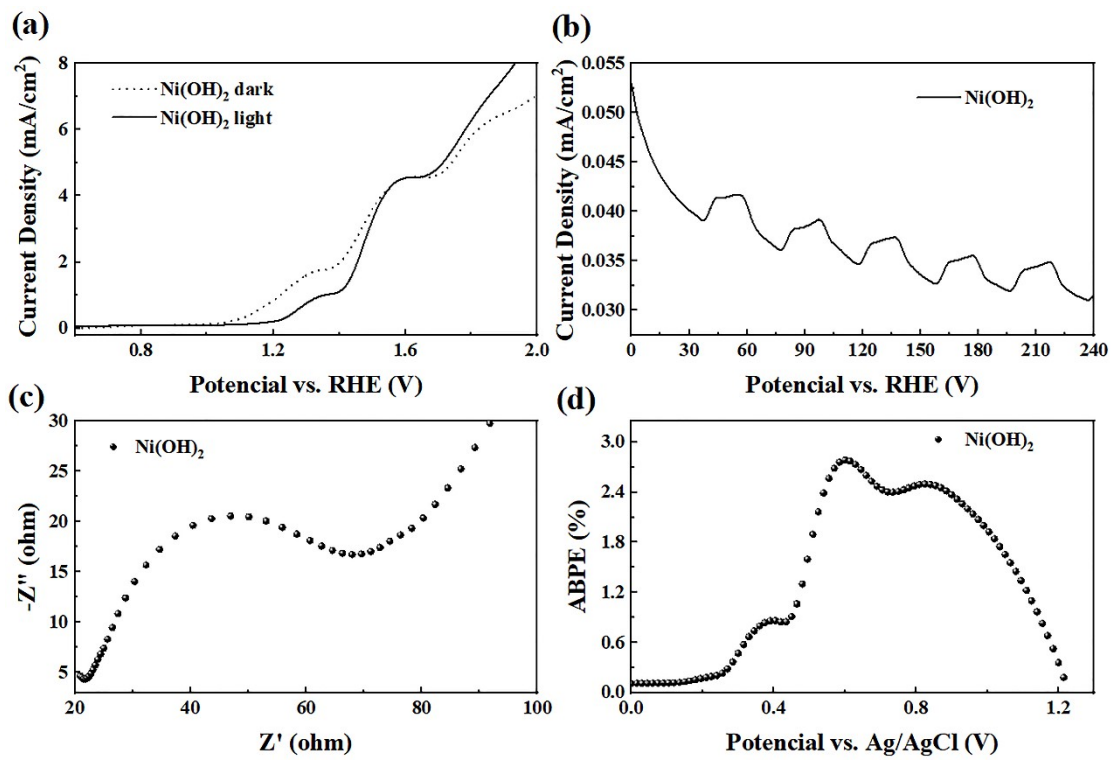

Fig. S6 PEC properties of pure  $\text{Ni}(\text{OH})_2$  (pH = 13).

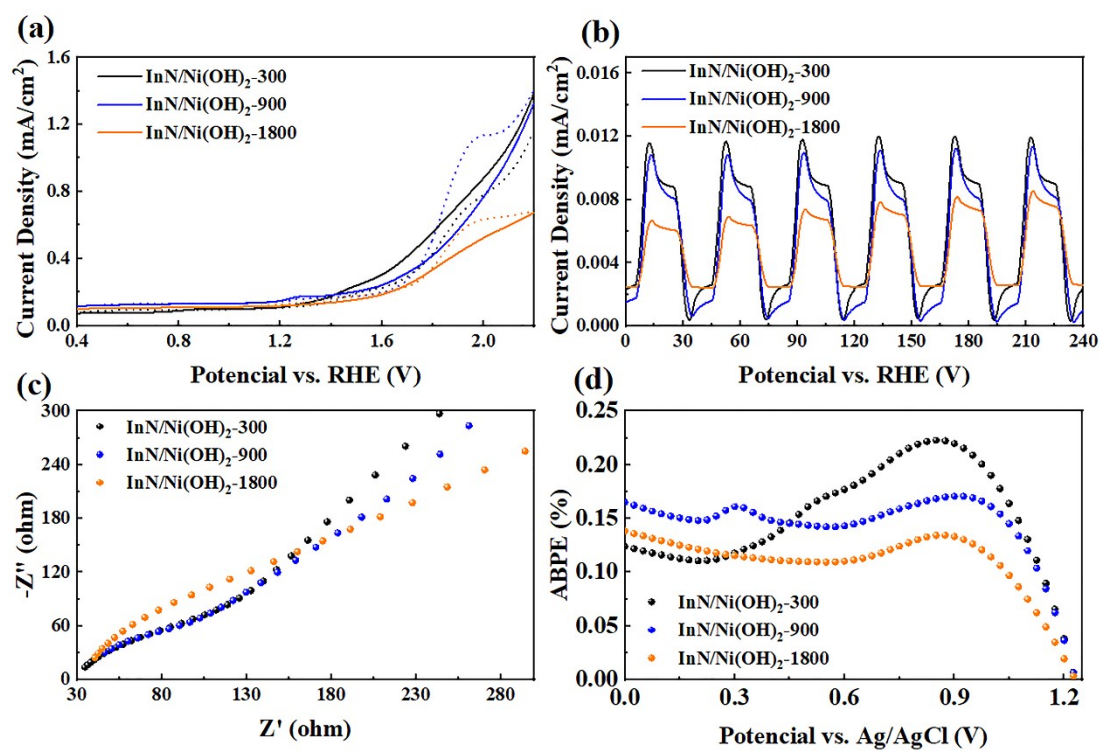

Fig. S7 PEC properties of InN and InN/Ni(OH)<sub>2</sub> photoelectrodes prepared by immersing method.



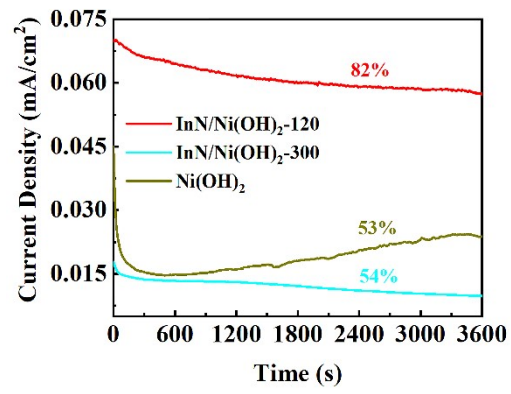

**Fig. S8** The stability of InN/Ni(OH)<sub>2</sub>-120 prepared by electrodepositing method, InN/Ni(OH)<sub>2</sub>-300 prepared by immersing method and pure Ni(OH)<sub>2</sub> (pH = 13).

**Table 1.** Summary of the PEC performance of InN-based and Ni(OH)<sub>2</sub>-based photoanodes under illumination of 100 mW cm<sup>-2</sup> (AM 1.5 G).

| PEC photoanode                        | Conditions                            | Photocurrent density                           | Reference         |
|---------------------------------------|---------------------------------------|------------------------------------------------|-------------------|
| InN NRs/Ni(OH) <sub>2</sub>           | 0.1 M NaOH                            | 4.43 mA cm <sup>-2</sup> at 1.47 V vs. RHE     | This work         |
| InN/Si                                | 1 M NaOH                              | 0.06 mA cm <sup>-2</sup> at 1.2 V vs. RHE      | Ref. <sup>1</sup> |
| In <sub>2</sub> O <sub>3</sub> /InN   | 0.1 M PBS                             | 0.795 mA cm <sup>-2</sup> at 1 V vs. Ag/AgCl   | Ref. <sup>2</sup> |
| InN/ZnO                               | 0.1 M Na <sub>2</sub> SO <sub>4</sub> | 0.017 mA cm <sup>-2</sup> at 1.4 V vs. RHE     | Ref. <sup>3</sup> |
| ZnO: InN                              | 0.5 M Na <sub>2</sub> SO <sub>4</sub> | 0.015 mA cm <sup>-2</sup> at 1 V vs. Ag/AgCl   | Ref. <sup>4</sup> |
| Ni(OH) <sub>2</sub> /ZnO              | 0.5 M Na <sub>2</sub> SO <sub>4</sub> | 1.68 mA cm <sup>-2</sup> at 1.25 V vs. Ag/AgCl | Ref. <sup>5</sup> |
| TiO <sub>2</sub> /Ni(OH) <sub>2</sub> | 1 M NaOH                              | 3.5 mA cm <sup>-2</sup> at 1.0 V vs. SCE       | Ref. <sup>6</sup> |
| TNTAs/Ni–Ni(OH) <sub>2</sub> /NiPi    | 0.5 M Na <sub>2</sub> SO <sub>4</sub> | 3.12 mA cm <sup>-2</sup> at 1.5 V vs. RHE      | Ref. <sup>7</sup> |
| ZnO/Ni(OH) <sub>2</sub>               | 0.5 M Na <sub>2</sub> SO <sub>4</sub> | 3.75 mA cm <sup>-2</sup> at 1.5 V vs. SCE      | Ref. <sup>8</sup> |

1. J. Kamimura, P. Bogdanoff, M. Ramsteiner, L. Geelhaar and H. Riechert, *Semicond. Sci. Technol.*, 2016, **31**, 074001.
2. A. Saroni, S. A. Rahman and B. T. Goh, *7th Asian Conference on Colloid and Interface Science (ACCIS)*, 2017, **5**, S186-S190.
3. H. Q. Liu, X. Z. Ma, Z. X. Chen, Q. G. Li, Z. Y. Lin, H. Liu, L. Y. Zhao and S. Chu, *Small*, 2018, **14**, 9.
4. S. S. Menon, H. Y. Hafeez, B. Gupta, K. Baskar, G. Bhalerao, S. Hussain, B. Neppolian and S. Singh, *Renewable Energy*, 2019, **141**, 760-769.
5. Y. C. Mao, H. Yang, J. X. Chen, J. Chen, Y. X. Tong and X. D. Wang, *Nano Energy*, 2014, **6**, 10-18.
6. H. Li, L. Jiang, J. Xi, J. Mu and X. Wu, *Materials Research Express*, 2017, **4**, 126202.
7. J. Wang, C. W. Zhuang, Y. K. Zhu, X. D. Wang, W. G. Zhang, Y. M. Liu and D. J. Yang, *Int. J. Hydrog. Energy*, 2022, **47**, 22063-22077.
8. H. Li, Y. Qi, Z. Li, Z. Ji and X. Wu, *Journal of Alloys and Compounds*, 2016, **661**, 201-205.
